# Supplementary material for: A new oxygen prescription produces real improvements in therapeutic oxygen use
Source: PubMed Central journal article supplement — BMJ Qual Improv Rep. 2014 Nov 21;3(1):u204031.w1815. doi: 10.1136/bmjquality.u204031.w1815 (PMC4645942; doi:10.1136/bmjquality.u204031.w1815), 2014-11-21
Supplement: bmjqir-3-u204031-w1815-s2.pdf [file bmjqir-3-u204031-w1815-s2.pdf]

Figure 1. Compliance of Trust oxygen prescribing practice with BTS guidelines.

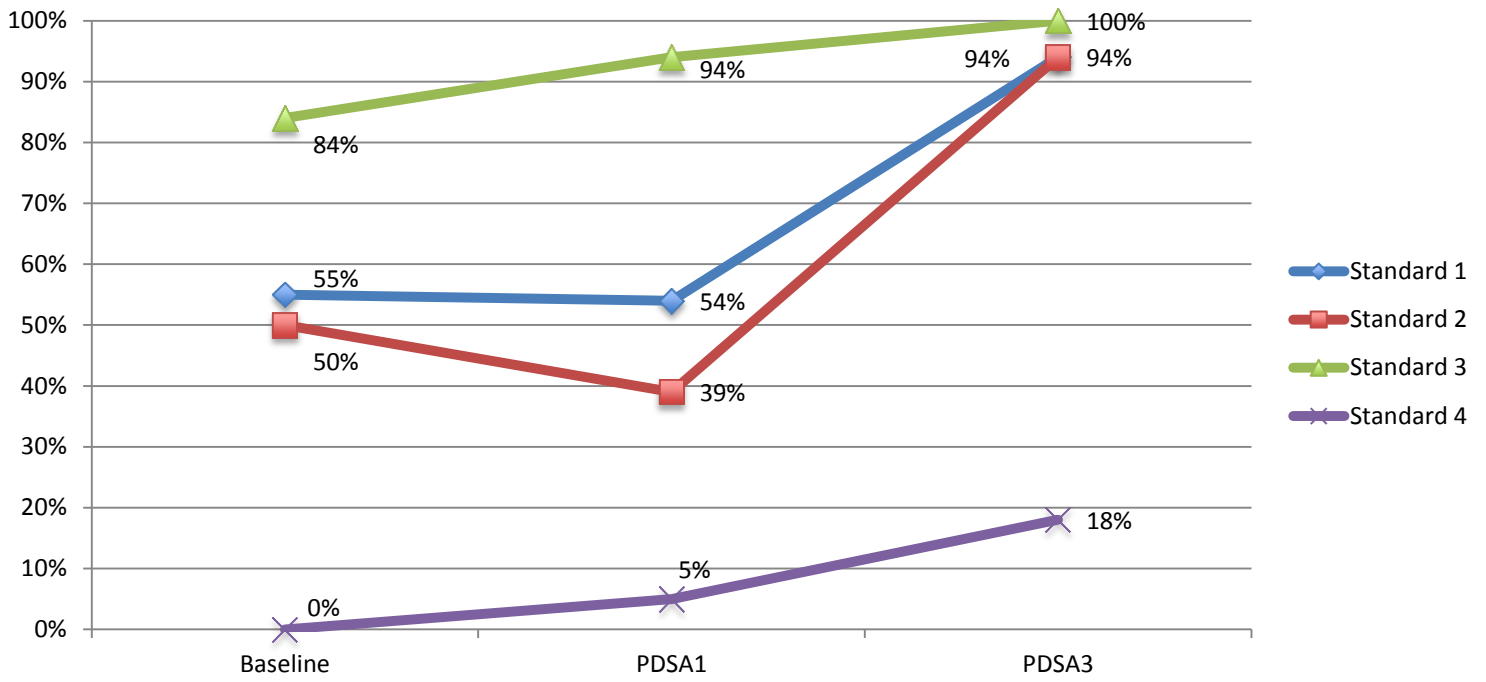

Figure 1. An upward trend demonstrates improvement.

Standard 1: percentage of oxygen users with a valid prescription

Standard 2: percentage of oxygen users with a documented target oxygen saturation range

Standard 3: percentage of oxygen users with documented oxygen saturations at each observations round

Standard 4: percentage of oxygen users with oxygen signed for on the prescription at each drugs round
